# Supplementary material
Source: PubMed Central journal article supplement (PMC7161782)
Supplement: BJH-157-709-s004.pdf [file BJH-157-709-s004.pdf]

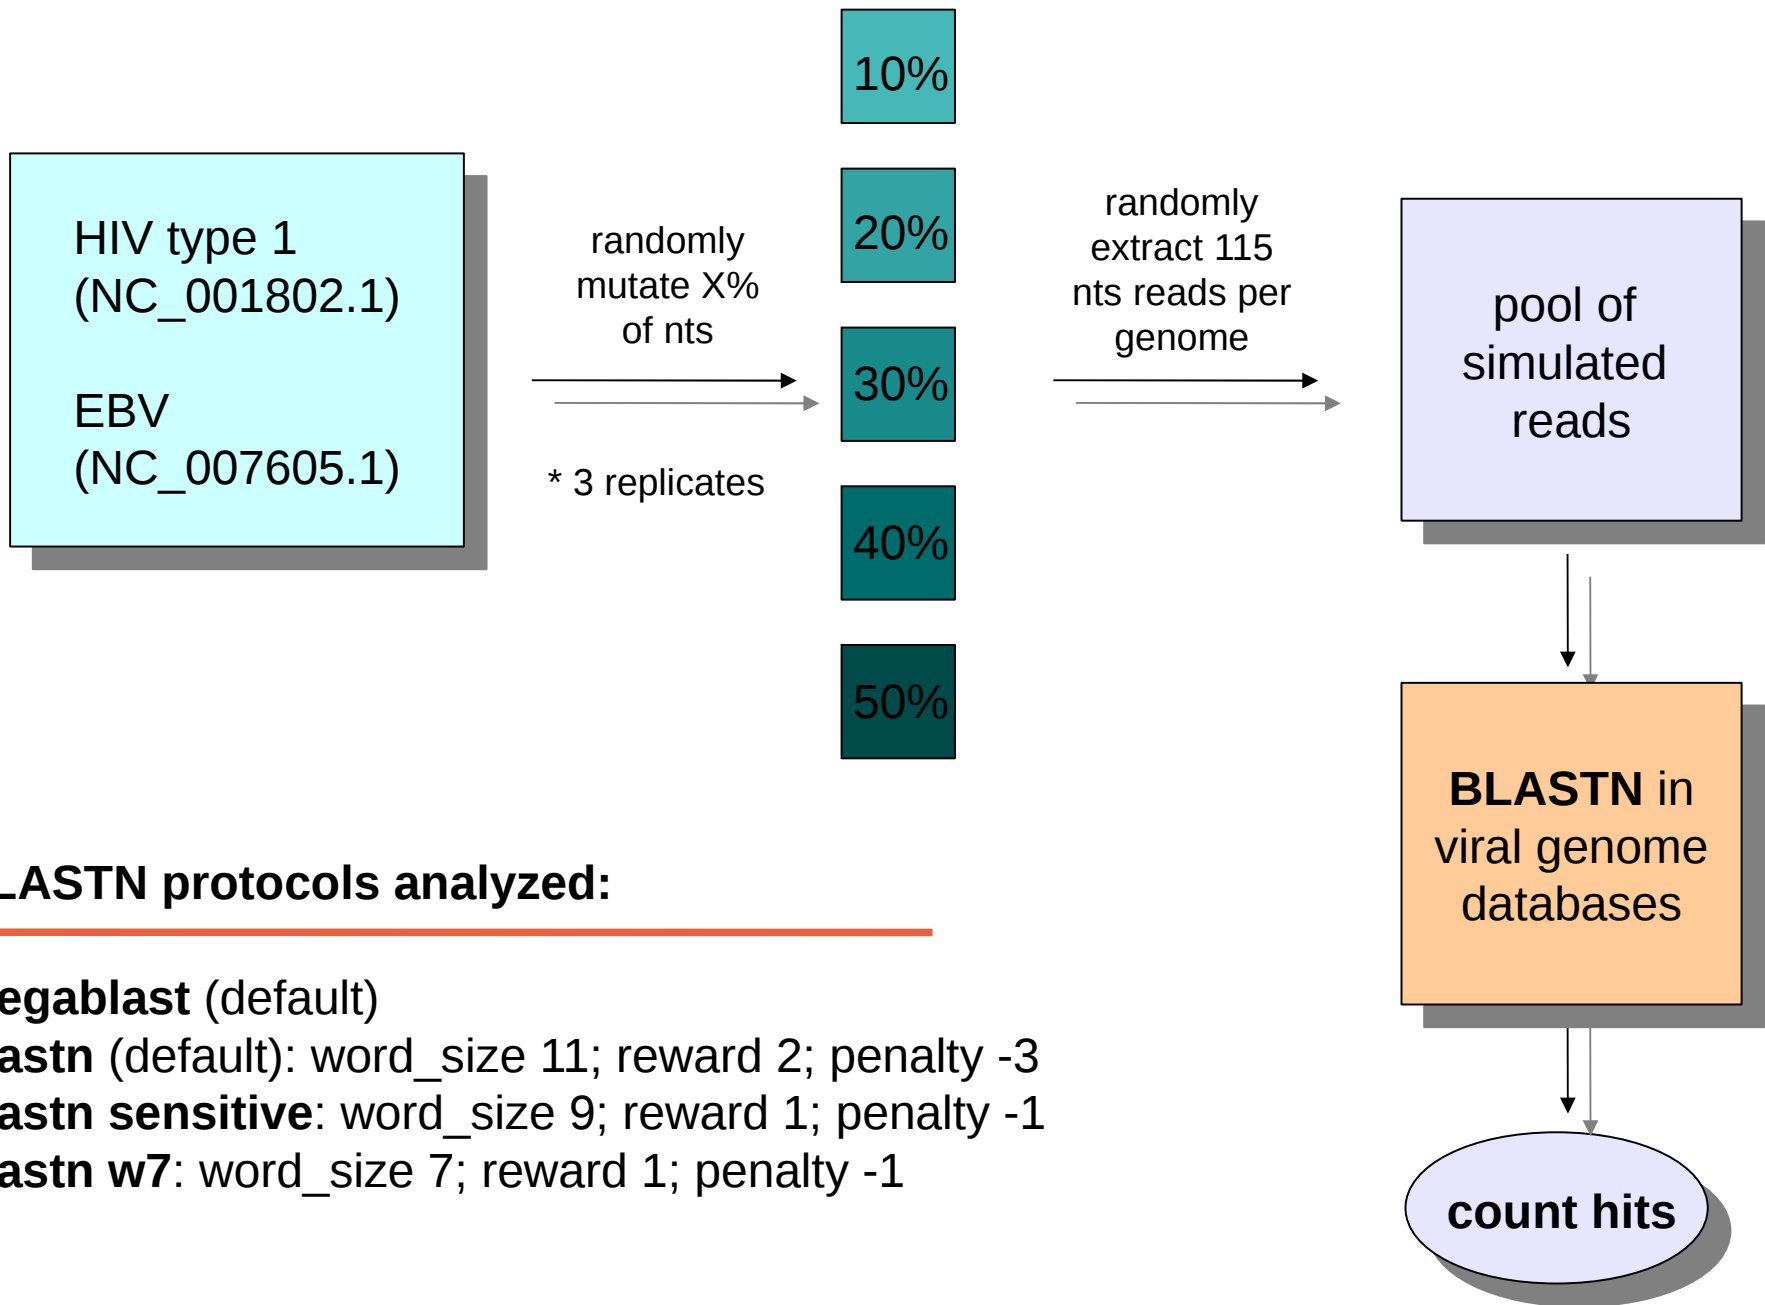

### BLASTN protocols analyzed:

---

**megablast** (default)

**blastn** (default): word\_size 11; reward 2; penalty -3

**blastn sensitive**: word\_size 9; reward 1; penalty -1

**blastn w7**: word\_size 7; reward 1; penalty -1
