# Supplementary material
Source: PubMed Central journal article supplement (PMC7161782)
Supplement: BJH-157-709-s007.pdf [file BJH-157-709-s007.pdf]

**Table S1.** Performance of different BLASTN protocols when searching simulated HIV reads.

|                            | <b>Default megablast</b> | <b>Default blastn</b> | <b>Blastn sensitive</b> | <b>Blastn w7</b> |
|----------------------------|--------------------------|-----------------------|-------------------------|------------------|
| <b>Runtime</b>             |                          |                       |                         |                  |
| Real time (s)              | 4.28                     | 12.38                 | 49.26                   | 569.69           |
| <b>Sensitivity (%)</b>     |                          |                       |                         |                  |
| HIV starting genome reads  | 100                      | 100                   | 100                     | 100              |
| <i>10% divergent reads</i> |                          |                       |                         |                  |
| replicate 1                | 46                       | 100                   | 100                     | 100              |
| replicate 2                | 54                       | 100                   | 100                     | 100              |
| replicate 3                | 54                       | 100                   | 100                     | 100              |
| <i>20% divergent reads</i> |                          |                       |                         |                  |
| replicate 1                | 6                        | 96                    | 100                     | 100              |
| replicate 2                | 7                        | 99                    | 100                     | 100              |
| replicate 3                | 9                        | 98                    | 100                     | 100              |
| <i>30% divergent reads</i> |                          |                       |                         |                  |
| replicate 1                | 3                        | 73                    | 95                      | 100              |
| replicate 2                | 0                        | 77                    | 96                      | 97               |
| replicate 3                | 0                        | 76                    | 94                      | 100              |
| <i>40% divergent reads</i> |                          |                       |                         |                  |
| replicate 1                | 0                        | 34                    | 69                      | 98               |
| replicate 2                | 0                        | 36                    | 67                      | 90               |
| replicate 3                | 0                        | 34                    | 69                      | 90               |
| <i>50% divergent reads</i> |                          |                       |                         |                  |
| replicate 1                | 0                        | 15                    | 48                      | 76               |
| replicate 2                | 0                        | 12                    | 46                      | 77               |
| replicate 3                | 0                        | 15                    | 40                      | 67               |

BLASTN protocols are named following the text in online supplementary File S1. Run-time was the execution time recorder for a BLASTN search (for each protocol) of 100 reads simulated from the starting HIV genome in the viral genomes database. Sensitivity (%) is defined as the percentage of reads from each simulation that effectively aligned to an HIV genome, using the specific BLASTN protocol, when searched in the viral genomes database.
