# Supplementary material
Source: PubMed Central journal article supplement (PMC7161782)
Supplement: BJH-157-709-s008.pdf [file BJH-157-709-s008.pdf]

**Table SII.** Distribution of BLASTN hits in the non-redundant database.

| <b>Reads</b>                  | <b>CLL250</b> | <b>CLL250_act</b> | <b>CLL238</b> | <b>CLL238_act</b> |
|-------------------------------|---------------|-------------------|---------------|-------------------|
| Mammalian                     | 176           | 162               | 198           | 455               |
| MPMV-like <sup>1</sup>        | 336           | 193               | 139           | 92                |
| Other virus-like <sup>2</sup> | 0             | 1                 | 13            | 6                 |
| Epstein-Barr virus            | 0             | 0                 | 0             | 9                 |
| Other <sup>3</sup>            | 146           | 121               | 161           | 176               |
| Total                         | 658           | 477               | 511           | 738               |

MPMV: Mason-Pfizer monkey virus. <sup>1</sup>As described in the text, reads showing alignments against the MPVM genome were finally assigned to a human tRNA-Lys origin. <sup>2</sup>This class comprise reads matching viral genomes other than MPMV or Epstein-Barr virus. These alignments were also dismissed. <sup>3</sup>Remaining alignments involved unexpected taxa. Sequencing errors might be one source of these results. See online supplementary File S2 for further details.
