# Supplementary material
Source: PubMed Central journal article supplement (PMC7161782)

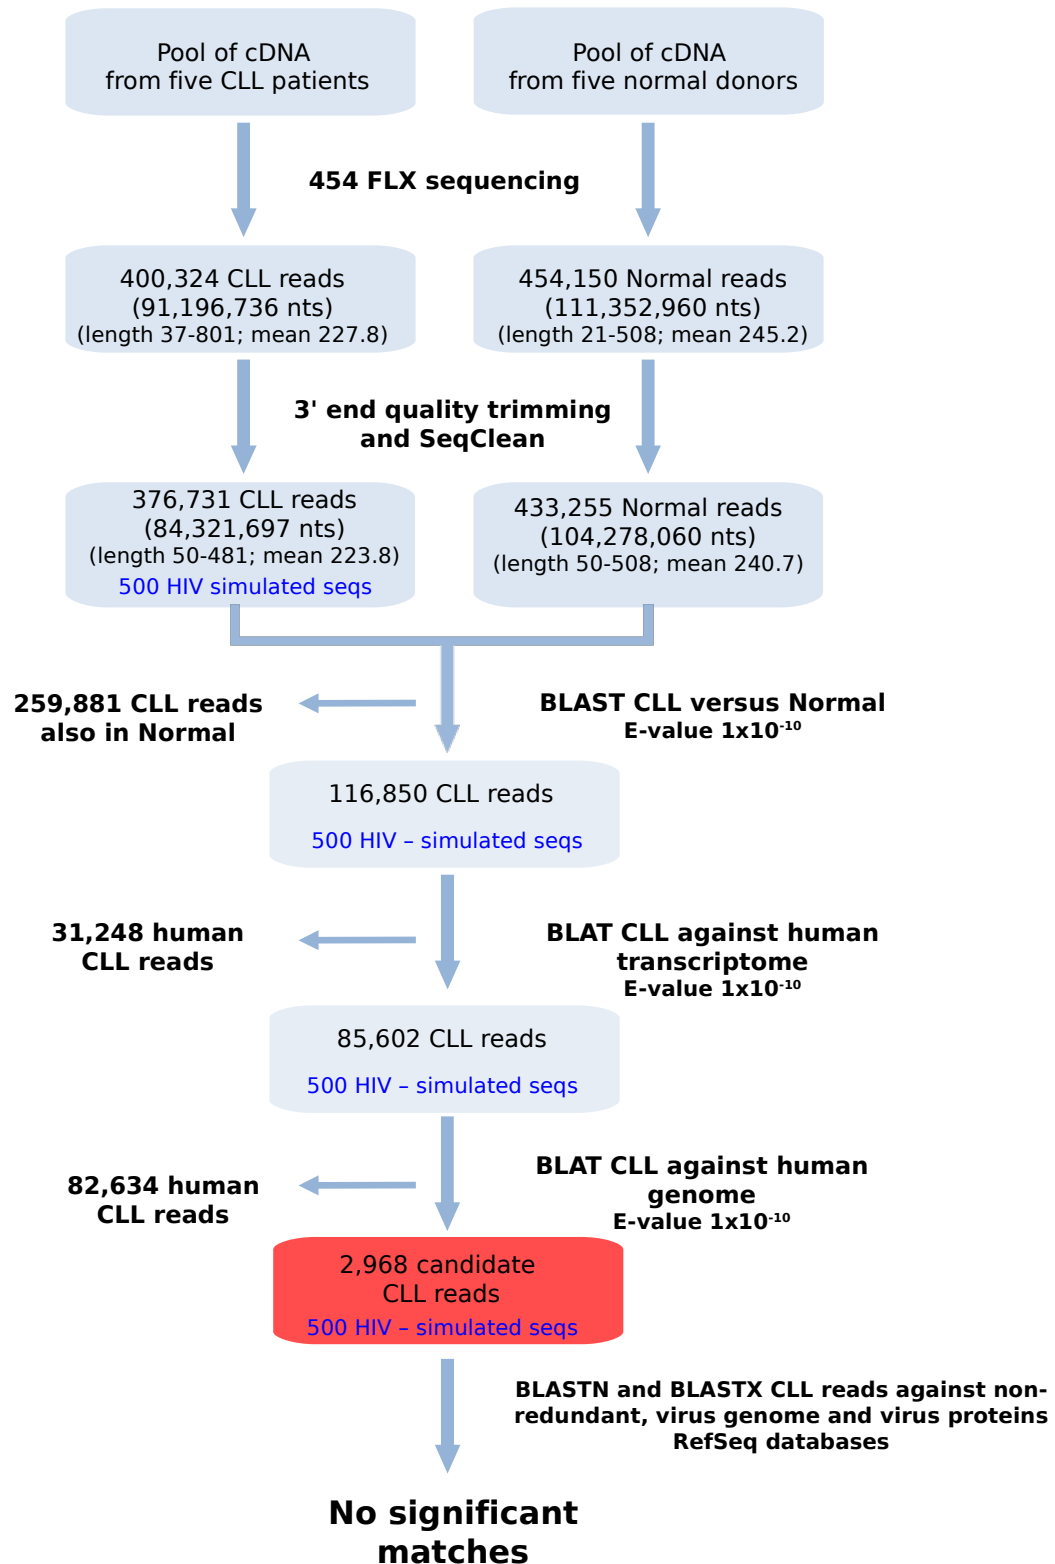

Supplement: BJH-157-709-s003.pdf [file BJH-157-709-s003.pdf]

A

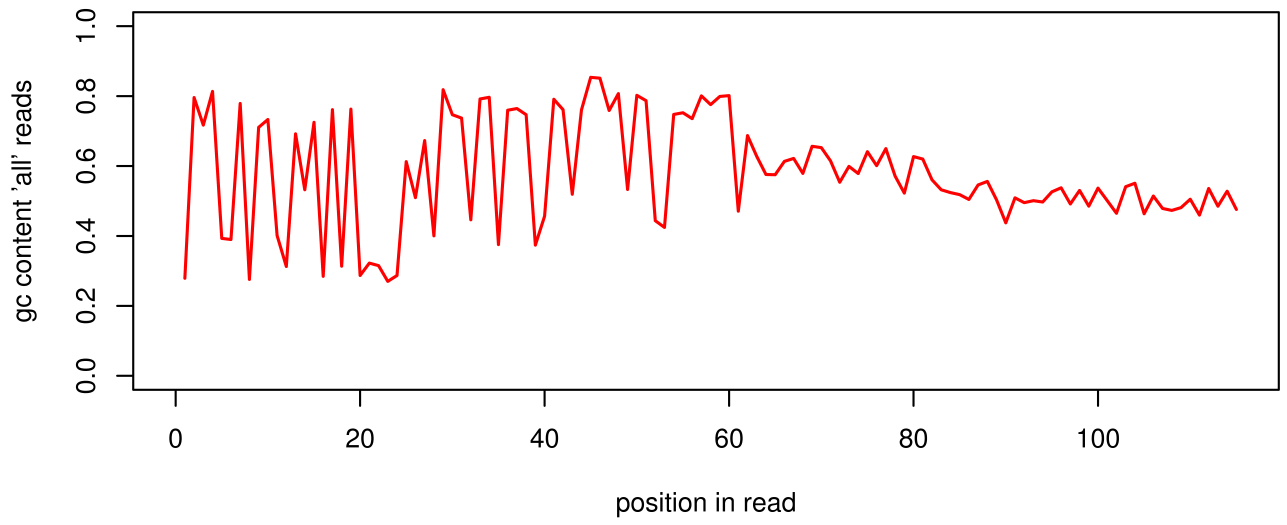

B

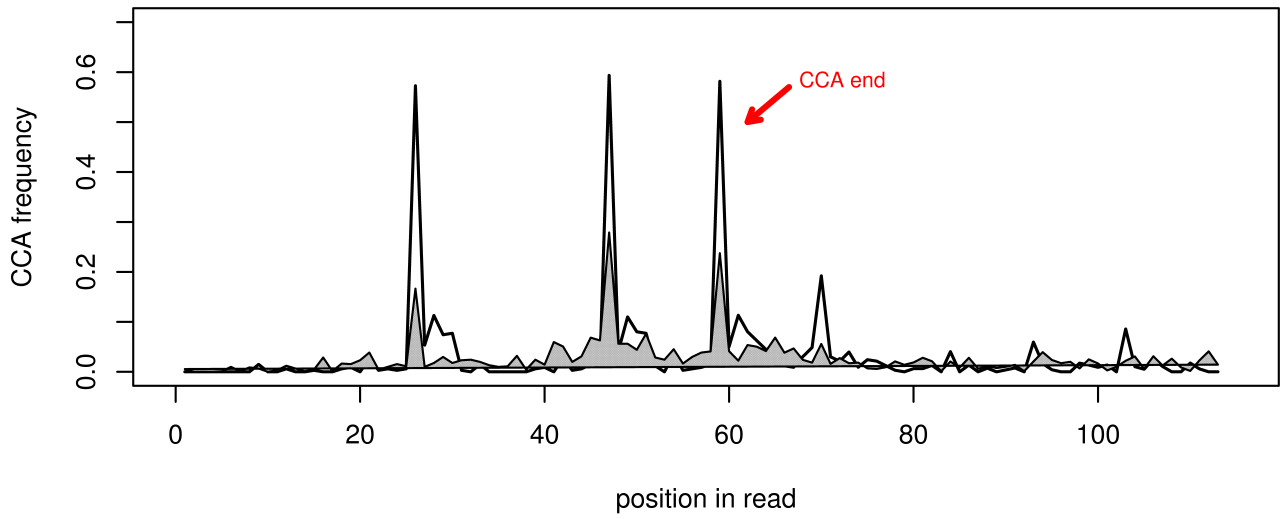

Supplement: BJH-157-709-s005.pdf [file BJH-157-709-s005.pdf]

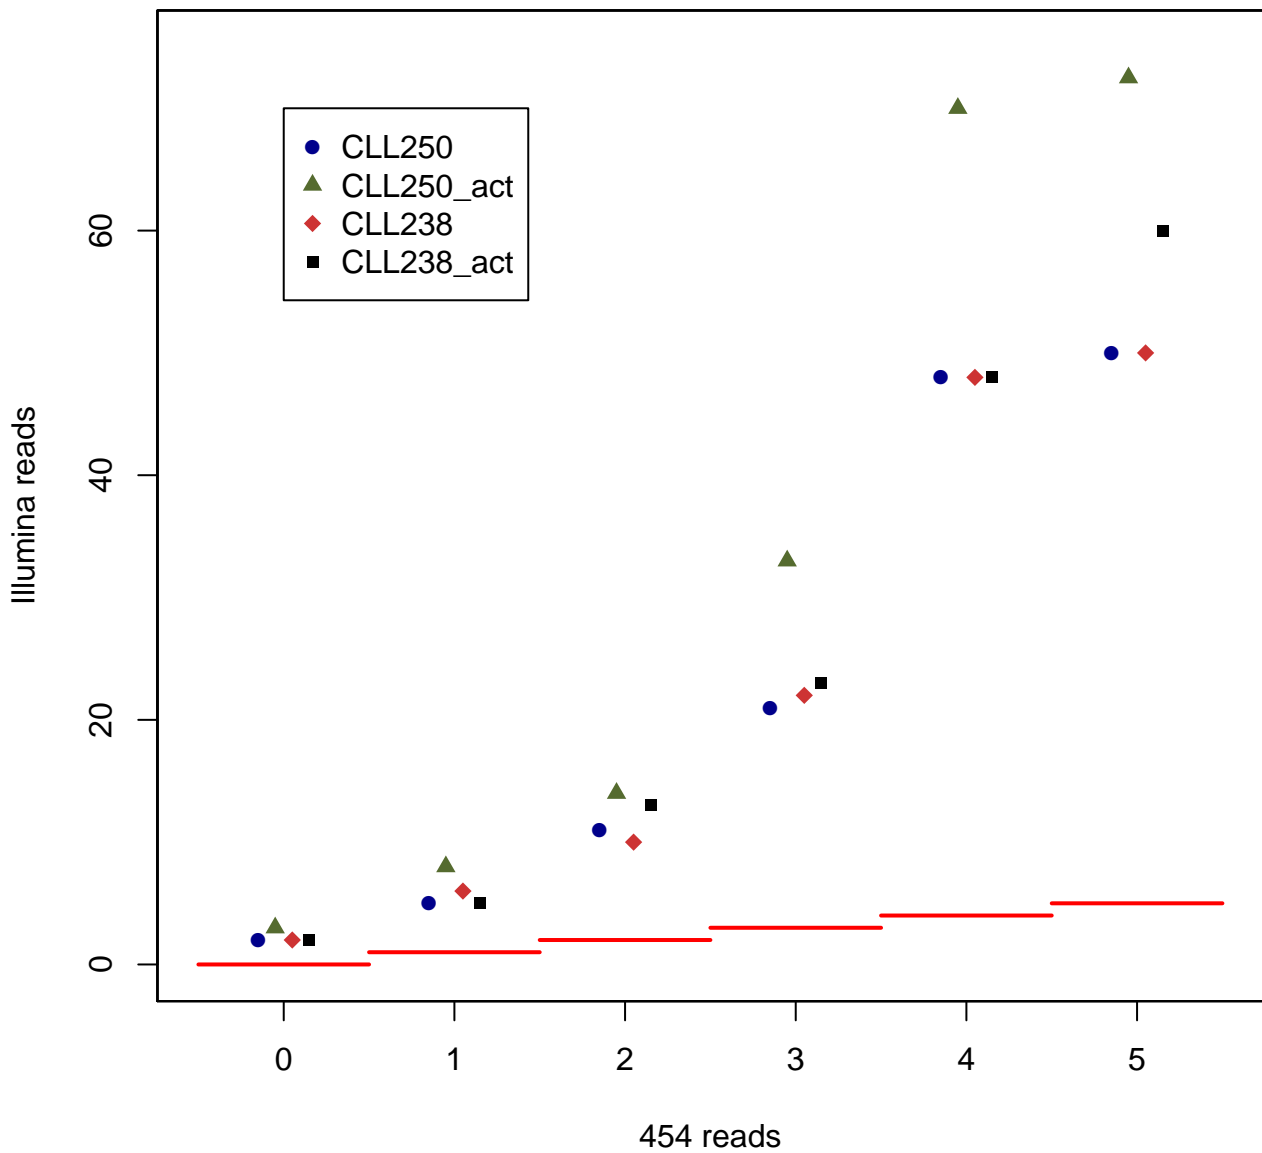

Supplement: BJH-157-709-s006.pdf [file BJH-157-709-s006.pdf]
